# Supplementary material for: A diverse Ediacara assemblage survived under low-oxygen conditions
Source: PubMed Central journal article supplement (PMC9701187; doi:10.1038/s41467-022-35012-y), 2022-11-27
Supplement: 41467_2022_35012_MOESM2_ESM.pdf [file 41467_2022_35012_MOESM2_ESM.pdf]

**File name: Supplementary Data 1**

**Description:** Compilation of all geochemical data presented for Olenek Uplift carbonates in this study.

**File name: Supplementary Data 2**

**Description:** U-Th-Pb isotopic data from detrital zircon of the Maastakh Formation.
